# Supplementary material for: Bimetallic metal–organic framework-derived cobalt selenide-based composites as bifunctional electrocatalysts for both hydrogen evolution and mono-alcohol oxidation
Source: Royal Society of Chemistry journal article supplement (doi:10.1039/d4ce00655k), 2024-01-01
Supplement: d4ce00655k1.pdf [file d4ce00655k1.pdf]

## Supporting Information

### **Bimetallic metal-organic framework-derived cobalt selenide-based composites as bifunctional electrocatalysts for both hydrogen evolution and mono-alcohol oxidation**

Lei Hu,<sup>\*a</sup> Peng Zhong,<sup>a</sup> Jie Zhu,<sup>a</sup> Jiacheng Wang,<sup>a</sup> Yuchen Zheng,<sup>a</sup> Xiaoming Lin,<sup>c</sup> Yuyang Zhang<sup>a</sup> and Hao Yang<sup>\*b</sup>

<sup>a</sup> School of Chemical and Environmental Engineering, Anhui Polytechnic University, Wuhu 241000, China. E-mail: [hulei@ahpu.edu.cn](mailto:hulei@ahpu.edu.cn)

<sup>b</sup> School of Chemistry & Chemical Engineering, Guangxi University, Nanning 530004, China. E-mail: [yanghao@gxu.edu.cn](mailto:yanghao@gxu.edu.cn)

<sup>c</sup> School of Chemistry, South China Normal University, Guangzhou 510006, China

**Fig. S1** SEM image of CuCo-MOF.

**Fig. S2** TEM image of Cu-Co<sub>0.85</sub>Se@NC.

**Fig. S3** XRD pattern of Co-MOF and CuCo-MOF.

**Fig. S4** Cu 2p spectra of Co<sub>0.85</sub>Se@NC and Cu-Co<sub>0.85</sub>Se@NC materials.

**Fig. S5** C 1s spectra of Co<sub>0.85</sub>Se@NC and Cu-Co<sub>0.85</sub>Se@NC materials.

**Fig. S6** N 1s spectra of Co<sub>0.85</sub>Se@NC and Cu-Co<sub>0.85</sub>Se@NC materials.

**Fig. S7** (a) HER long-term stability test for the Cu-Co<sub>0.85</sub>Se@NC. (b) LSV curves of Cu-Co<sub>0.85</sub>Se@NC before and after the stability test.

**Fig. S8** XRD pattern of Cu-Co<sub>0.85</sub>Se@NC before and after the HER stability test.

**Fig. S9** (a) HER polarization curves, (b) HER Tafel slopes, (c) OER polarization curves and (d) OER Tafel slopes for Cu-Co<sub>0.85</sub>Se@NC, Cu-Co<sub>0.85</sub>Se@NC-1 and Cu-Co<sub>0.85</sub>Se@NC-2 electrocatalysts.

**Fig. S10** CV curves of (a) Co<sub>0.85</sub>Se@NC and (b) Cu-Co<sub>0.85</sub>Se@NC at different scan rates of 20, 50, 100, 150 and 200 mV s<sup>-1</sup>.

**Fig. S11** Nyquist plots of Co<sub>0.85</sub>Se@NC and Cu-Co<sub>0.85</sub>Se@NC electrodes.

**Fig. S12** Performance comparison of the mono-alcohol oxidation reaction (M-AOR) with different concentrations of electrolytes.

**Fig. S13** (a) CV curves at various scan rates from 20 mV s<sup>-1</sup> to 200 mV s<sup>-1</sup> for Cu-Co<sub>0.85</sub>Se@NC. (b) The corresponding C<sub>dl</sub> value comparison of Cu-Co<sub>0.85</sub>Se@NC in 1.0 M KOH with and without methanol.

**Fig. S14** (a) MOR long-term stability test for the Cu-Co<sub>0.85</sub>Se@NC. (b) LSV curves of Cu-Co<sub>0.85</sub>Se@NC before and after the stability test.

**Fig. S15** Raman spectrum of Co<sub>0.85</sub>Se@NC and Cu-Co<sub>0.85</sub>Se@NC catalysts after HER test.

**Fig. S16** The contact angles of Cu-Co<sub>0.85</sub>Se@NC in (a) n-propanol, (b) isopropanol and (c) ethanol.

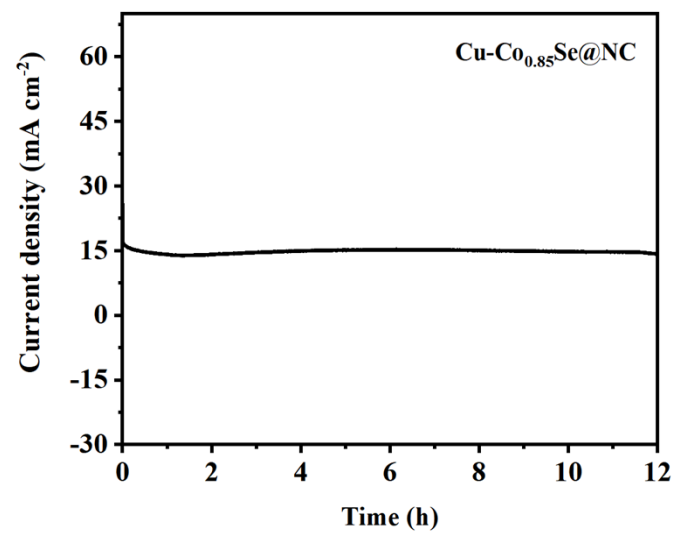

**Fig. S17** The i-t curve of the Cu-Co<sub>0.85</sub>Se@NC catalyst.
